# Supplementary material
Source: PubMed Central journal article supplement (PMC7879423)
Supplement: NIHMS1665934-supplement-Supplement.pdf [file NIHMS1665934-supplement-Supplement.pdf]

**Online supplementary material for “Spending on Young Children With Autism Spectrum Disorder in Employer-Sponsored Plans, 2011–2017”**

Contents

1. Addendum on Data and Methods
2. Supplementary Tables S1—S9
3. Supplementary Figure S1

## **Addendum on Data and Methods**

The IBM® MarketScan® Commercial and Medicare Supplemental Research Databases contain individual-level, de-identified, integrated inpatient and outpatient medical (both the facility and physician/provider component), prescription drug and mental health claims, and enrollment information submitted to IBM Watson Health™ by commercial payers under business agreements with large employers and health plans. Data about individual patients are integrated from all providers of care, maintaining healthcare utilization and cost record connections at the patient level. Used primarily for research, these databases are fully compliant with U.S. privacy laws and regulations (i.e., HIPAA). Research using MarketScan data has been widely published in peer-reviewed medical and health services journals.

Since their creation in the early 1990s, the MarketScan databases have grown into one of the largest collections of de-identified patient-level data in the United States. The claims information contained in the databases is drawn from UB04 and CMS1500 forms, and represents transactions fully adjudicated and paid under employer-sponsored group health plans, including Medicare supplemental plans.

There are two distinct types of data contributors in the Commercial databases: Employer and Health plan. The former refers to plans sponsored by large employers where the employer is the source of data. These are large, self-insured employers that bear the insurance risk and contract with health plans to administer plans for their employees and family members, although a small number of covered beneficiaries are in fully-insured plans with a fixed payment per member per month. The second data source are commercial health plans that sell insurance to other, mostly fully-insured employers, in which case the plan bears the financial risk. The original MarketScan databases were populated solely by large employers. Subsequently, the numbers of health plans increased initially before decreasing in more recent years.

The MarketScan Commercial and Medicare Supplemental population includes enrolled employees, retirees and their covered dependents. All 50 US states are represented, and all types of health plans, including comprehensive, PPO, EPO, HMO, POS, CDHP and HDHP plan types. The databases classify health plans into 8 types, 2 of which are classified as capitated plan types: health maintenance organization (HMO) and capitated or partially capitated point of service (POS) plans. By “capitated” it is meant that for some or all services providers are paid a fixed amount per member per month rather than being reimbursed for individual services or encounters.

MarketScan databases also identify health plans that have carve-outs for either outpatient pharmaceuticals or mental health and substance abuse (MHSA) services. A carve-out means that the health plan subcontracts to another company that administers payments for those services, and the data on those services may not be reported back to the health plan and then reported to IBM Watson Health. That does not mean that the health plans do not cover those services, only that the claims and encounters data are likely to be incomplete for those services.

Each covered member of a household enrolled in a participating plan is assigned a unique enrollee ID variable that is used to link claims at the patient level. As long as someone remains enrolled, or becomes reenrolled, in the same plan or, for self-insured employers, any plan sponsored by the same employer, their encounters can be tracked using that enrollee ID. An individual enrollee ID may disappear from the MarketScan database if the enrollee dies, disenrolls, the plan ceases contributing data to IBM Watson

Health, or the primary enrollee changes employer or, for health plans contracting with small employers, changes health plans.

MarketScan databases report three types of payments. Total payments represent total allowable charges, i.e., the amount of money that the plan determines the provider should receive for a submitted claim. That is the sum of plan payments, i.e., actual reimbursements to providers, and out-of-pocket payments, i.e., the amount that patients are responsible for. Out-of-pocket payments include the amounts of copays and deductibles. Total expenditures in this study represent total payments.

We accessed the MarketScan data using the IBM MarketScan Treatment Pathways 4.0. Treatment Pathways is an online analytic platform with a visual interface that includes a subset of variables from MarketScan databases. It is restricted to plans that both cover prescription drugs and do not have pharmaceutical carve-outs. Treatment Pathways has a MHS A Coverage indicator variable that can be used to exclude plans with MHS A carve-outs.

MarketScan Commercial and Medicare data have limited demographic information: age and sex; race/ethnicity information is absent. Geographic information in the Treatment Pathways version is limited to the nine U.S. Census divisions, which can be aggregated to the four Census regions, and rural (non-metropolitan) vs. urban residence. The geographic information is based on the location of the primary enrollee whereas dependent enrollees may reside elsewhere, even in a different state. The data submitted to IBM Watson Health is a convenience sample. The demographic and geographic distributions in these databases differ somewhat from the national distribution of the privately insured population.

Continuous enrollment in Treatment Pathways is calculated using data from the MarketScan Detail Enrollment table. Continuous enrollment within Treatment Pathways bridges up to a 45-day gap between actual enrollment eras and the 45-day rule is applied as many times as appropriate for a patient.

MarketScan is a registered trademark of IBM Corporation in the United States, other countries or both.

Table S1. Inclusion and exclusion criteria for study sample by calendar year, 2011-2017

| Enrollees (N) | Exclusion (%) | Criterion                                                 |
|---------------|---------------|-----------------------------------------------------------|
| 2011          |               |                                                           |
| 46,313,275    |               | Any enrollment in calendar year, all ages, all plan types |
| 30,773,534    | 33.6          | Exclude partial enrollment                                |
| 24,460,921    | 20.5          | Exclude capitated plans                                   |
| 20,843,920    | 14.8          | Require outpatient claim                                  |
| 11,775,831    | 43.5          | Restrict to large employer plans                          |
| 11,185,327    | 5.0           | Restrict to MHSA coverage                                 |
| 760,791       | 93.2          | Ages 3-7 years at beginning of calendar year              |
| 2012          |               |                                                           |
| 46,794,137    |               | Any enrollment in calendar year, all ages, all plan types |
| 31,339,906    | 33.0          | Exclude partial enrollment                                |
| 25,559,453    | 18.4          | Exclude capitated plans                                   |
| 21,809,781    | 14.7          | Require outpatient claim                                  |
| 12,406,052    | 43.1          | Restrict to large employer plans                          |
| 11,719,357    | 5.5           | Restrict to MHSA coverage                                 |
| 786,994       | 93.3          | Ages 3-7 years at beginning of calendar year              |
| 2013          |               |                                                           |
| 38,793,170    |               | Any enrollment in calendar year, all ages, all plan types |
| 25,877,256    | 33.3          | Exclude partial enrollment                                |
| 21,497,060    | 16.9          | Exclude capitated plans                                   |
| 18,411,413    | 14.4          | Require outpatient claim                                  |
| 12,729,679    | 30.9          | Restrict to large employer plans                          |
| 12,063,095    | 5.2           | Restrict to MHSA coverage                                 |
| 803,608       | 93.3          | Ages 3-7 years at beginning of calendar year              |
| 2014          |               |                                                           |
| 39,066,404    |               | Any enrollment in calendar year, all ages, all plan types |
| 25,973,543    | 33.5          | Exclude partial enrollment                                |
| 21,584,854    | 16.9          | Exclude capitated plans                                   |
| 18,511,369    | 14.2          | Require outpatient claim                                  |
| 12,746,647    | 31.1          | Restrict to large employer plans                          |
| 12,129,305    | 4.8           | Restrict to MHSA coverage                                 |
| 795,693       | 93.4          | Ages 3-7 years at beginning of calendar year              |
| 2015          |               |                                                           |
| 29,558,981    |               | Any enrollment in calendar year, all ages, all plan types |
| 20,215,746    | 31.6          | Exclude partial enrollment                                |
| 17,707,533    | 12.4          | Exclude capitated plans                                   |
| 15,226,611    | 14.0          | Require outpatient claim                                  |
| 12,202,366    | 19.9          | Restrict to large employer plans                          |
| 11,614,483    | 4.8           | Restrict to MHSA coverage                                 |
| 756,019       | 93.5          | Ages 3-7 years at beginning of calendar year              |
| 2016          |               |                                                           |
| 28,805,675    |               | Any enrollment in calendar year, all ages, all plan types |

|            |      |                                                           |
|------------|------|-----------------------------------------------------------|
| 19,784,521 | 31.3 | Exclude partial enrollment                                |
| 17,352,335 | 12.3 | Exclude capitated plans                                   |
| 14,932,743 | 13.9 | Require outpatient claim                                  |
| 12,094,506 | 19.0 | Restrict to large employer plans                          |
| 11,469,264 | 5.2  | Restrict to MHSA coverage                                 |
| 742,661    | 93.5 | Ages 3-7 years at beginning of calendar year              |
| 2017       |      |                                                           |
| 26,230,543 |      | Any enrollment in calendar year, all ages, all plan types |
| 18,334,812 | 30.1 | Exclude partial enrollment                                |
| 16,028,065 | 12.6 | Exclude capitated plans                                   |
| 13,815,585 | 13.8 | Require outpatient claim                                  |
| 11,834,373 | 14.3 | Restrict to large employer plans                          |
| 11,214,462 | 5.2  | Restrict to MHSA coverage                                 |
| 722,348    | 93.6 | Ages 3-7 years at beginning of calendar year              |

Table S2. Procedure codes for behavioral and mental health services.

a. Behavioral intervention-related procedure codes

|       |                                                                                                                                                                                                                                                                              |
|-------|------------------------------------------------------------------------------------------------------------------------------------------------------------------------------------------------------------------------------------------------------------------------------|
| 96125 | Standardized cognitive performance testing per hour of a qualified health care professional's time, both face-to-face administering tests to the patient and time interpreting these test results and preparing the report                                                   |
| 96150 | Health and behavioral assessment, initial, each 15 minutes                                                                                                                                                                                                                   |
| 96151 | Health and behavioral reassessment, each 15 minutes                                                                                                                                                                                                                          |
| 96152 | Health and behavior intervention, individual, each 15 minutes                                                                                                                                                                                                                |
| 96153 | Health and behavior intervention, each 15 minutes, face-to-face                                                                                                                                                                                                              |
| 96154 | Health and behavior intervention, each 15 minutes, group, 2 or more                                                                                                                                                                                                          |
| 96155 | Health and behavior intervention to family, without patient present                                                                                                                                                                                                          |
| 97532 | Development of cognitive skills to improve attention, memory, problem-solving (includes compensatory training) direct (one-on-one) patient contact by the provider, each 15 minutes                                                                                          |
| 97533 | Sensory integrative techniques to enhance sensory processing and promote adaptive responses to environmental demands, direct (one-on-one) patient contact by the provider, each 15 minutes                                                                                   |
| 99484 | Care management services for behavioral health conditions, at least 20 minutes of clinical staff time, directed by a physician or other qualified health care professional, per calendar month, with the following required elements: initial assessment or follow-up        |
| 99499 | Unlisted evaluation and management service                                                                                                                                                                                                                                   |
| H0004 | Behavioral health counseling and therapy, per 15 minutes                                                                                                                                                                                                                     |
| H0030 | Behavioral health hotline service                                                                                                                                                                                                                                            |
| H0031 | Mental health assessment, by non-physician                                                                                                                                                                                                                                   |
| H0032 | Mental health service plan development by non-physician                                                                                                                                                                                                                      |
| H2012 | Behavioral health day treatment, per hour                                                                                                                                                                                                                                    |
| H2014 | Skills training and development, per 15 minutes                                                                                                                                                                                                                              |
| H2019 | Therapeutic behavioral services, per 15 minutes                                                                                                                                                                                                                              |
| H2020 | Therapeutic behavioral services, per diem                                                                                                                                                                                                                                    |
| 0359T | 0359T Behavior identification assessment, by the physician or other qualified health care professional, face-to-face with patient and caregiver(s), includes administration of standardized and non-standardized tests, detailed behavioral history, and patient observation |
| 0360T | Observational behavioral follow-up assessment, includes physician or other qualified health care professional direction with interpretation and report, administered by one technician; first 30 minutes of technician time, face-to-face with the patient                   |
| 0361T | Observational behavioral follow-up assessment, includes physician or other qualified health care professional direction with interpretation and report, administered by one technician; each additional 30 minutes of technician time, face-to-face                          |
| 0362T | Exposure behavioral follow-up assessment, includes physician or other qualified health care professional direction with interpretation and report, administered by physician or other qualified health care professional                                                     |
| 0363T | Exposure behavioral follow-up assessment, includes physician or other qualified health care professional direction with interpretation and report, administered by physician or other qualified health care professional                                                     |
| 0364T | Adaptive behavior treatment by protocol, administered by technician, face-to-face with one patient; first 30 minutes of technician time                                                                                                                                      |
| 0365T | Adaptive behavior treatment by protocol, administered by technician, face-to-face with one patient; each additional 30 minutes of technician time (List separately in addition to code for primary procedure)                                                                |
| 0366T | Group adaptive behavior treatment by protocol, administered by technician, face-to-face with two or more patients; first 30 minutes of technician time                                                                                                                       |
| 0367T | Group adaptive behavior treatment by protocol, administered by technician, face-to-face with two or more patients; each additional 30 minutes of technician time (List separately in                                                                                         |

|       |                                                                                                                                                                                                                                                                                        |
|-------|----------------------------------------------------------------------------------------------------------------------------------------------------------------------------------------------------------------------------------------------------------------------------------------|
|       | addition to code for primary procedure)                                                                                                                                                                                                                                                |
| 0368T | Adaptive behavior treatment with protocol modification administered by physician or other qualified health care professional with one patient; first 30 minutes of patient face-to-face time                                                                                           |
| 0369T | Adaptive behavior treatment with protocol modification administered by physician or other qualified health care professional with one patient; each additional 30 minutes of patient face-to-face time (List separately in addition to code for primary procedure)                     |
| 0370T | Family adaptive behavior treatment guidance, administered by physician or other qualified health care professional (without the patient present)                                                                                                                                       |
| 0371T | Multiple-family group adaptive behavior treatment guidance, administered by physician or other qualified health care professional (without the patient present)                                                                                                                        |
| 0372T | Adaptive behavior treatment social skills group, administered by physician or other qualified health care professional face-to-face with multiple patients                                                                                                                             |
| 0373T | Exposure adaptive behavior treatment with protocol modification requiring two or more technicians for severe maladaptive behavior(s); first 60 minutes of technicians' time, face-to-face with patient                                                                                 |
| 0374T | Exposure adaptive behavior treatment with protocol modification requiring two or more technicians for severe maladaptive behavior(s); each additional 30 minutes of technicians' time face-to-face with patient                                                                        |
| G0176 | Activity therapy, such as music, dance, art or play therapies not for recreation, related to the care and treatment of patient's disabling mental health problems, per session (45 minutes or more)                                                                                    |
| G0502 | Initial psychiatric collaborative care management, first 70 minutes in the first calendar month of behavioral health care manager activities, in consultation with a psychiatric consultant, and directed by the treating physician or other qualified health provider                 |
| G0503 | Subsequent psychiatric collaborative care management, first 60 minutes in a subsequent month of behavioral health care manager activities, in consultation with a psychiatric consultant, and directed by the treating physician or other qualified health provider                    |
| G0504 | Initial or subsequent psychiatric collaborative care management, each additional 30 minutes in a calendar month of behavioral health care manager activities, in consultation with a psychiatric consultant, and directed by the treating physician or other qualified health provider |
| G0506 | Comprehensive assessment of and care planning for patients requiring chronic care management services (list separately in addition to primary monthly care management service)                                                                                                         |
| G0507 | Care management services for behavioral health conditions, at least 20 minutes of clinical staff time, directed by a physician or other qualified health care professional, per calendar month, with the following required elements: initial assessment                               |
| G0511 | Rural health clinic or federally qualified health center (rhc or fqhc) only, general care management, 20 minutes or more of clinical staff time for chronic care management services or behavioral health integration services directed by an rhc or fqhc                              |
| G8539 | Functional outcome assessment documented as positive using a standardized tool and a care plan based on identified deficiencies on the date of functional outcome assessment, is documented                                                                                            |
| G9012 | Other specified case management service not elsewhere classified                                                                                                                                                                                                                       |
| S5108 | Home care training to home care client, per 15 minutes                                                                                                                                                                                                                                 |
| S5109 | Home care training to home care client, per session                                                                                                                                                                                                                                    |
| S5110 | Home care training to home care client, per 15 minutes                                                                                                                                                                                                                                 |
| S5111 | Home care training to home care client, per session                                                                                                                                                                                                                                    |
| S9480 | Intensive outpatient psychiatric services, per diem                                                                                                                                                                                                                                    |
| S9484 | Crisis intervention mental health services, per hour                                                                                                                                                                                                                                   |
| S9485 | Crisis intervention mental health services, per diem                                                                                                                                                                                                                                   |
| T1040 | Medicaid certified community behavioral health clinic services, per diem                                                                                                                                                                                                               |
| T1041 | Medicaid certified community behavioral health clinic services, per month                                                                                                                                                                                                              |

b. Mental health procedure codes

|       |                                                                                                                                                                                                                                                                                                          |
|-------|----------------------------------------------------------------------------------------------------------------------------------------------------------------------------------------------------------------------------------------------------------------------------------------------------------|
| 90791 | Initial evaluation provided by a non-physician/no medical services. Includes psychiatric/psychological assessment, history, mental status and recommendations; may include communication with family, others, and review and ordering of diagnostic studies.                                             |
| 90792 | Initial evaluation, including psychiatric/psychological diagnostic interview with medical services                                                                                                                                                                                                       |
| 90801 | Psychiatric diagnostic interview examination                                                                                                                                                                                                                                                             |
| 90802 | Interactive psychiatric diagnostic interview examination using play equipment, physical devices, language interpreter, or other mechanisms of communication                                                                                                                                              |
| 90804 | Individual psychotherapy, insight oriented, behavior modifying and/or supportive, in an office or outpatient facility, approximately 20 to 30 minutes face-to-face with the patient;                                                                                                                     |
| 90805 | Individual psychotherapy, insight oriented, behavior modifying and/or supportive, in an office or outpatient facility, approximately 20 to 30 minutes face-to-face with the patient; with medical evaluation and management services                                                                     |
| 90806 | Individual psychotherapy, insight oriented, behavior modifying and/or supportive, in an office or outpatient facility, approximately 45 to 50 minutes face-to-face with the patient                                                                                                                      |
| 90807 | Individual psychotherapy, insight oriented, behavior modifying and/or supportive, in an office or outpatient facility, approximately 45 to 50 minutes face-to-face with the patient; with medical evaluation and management services                                                                     |
| 90808 | Individual psychotherapy, insight oriented, behavior modifying and/or supportive, in an office or outpatient facility, approximately 75 to 80 minutes face-to-face with the patient                                                                                                                      |
| 90809 | Individual psychotherapy, insight oriented, behavior modifying and/or supportive, in an office or outpatient facility, approximately 75 to 80 minutes face-to-face with the patient; with medical evaluation and management services                                                                     |
| 90810 | Individual psychotherapy, interactive, using play equipment, physical devices, language interpreter, or other mechanisms of non-verbal communication, in an office or outpatient facility, approximately 20 to 30 minutes face-to-face with the patient                                                  |
| 90811 | Individual psychotherapy, interactive, using play equipment, physical devices, language interpreter, or other mechanisms of non-verbal communication, in an office or outpatient facility, approximately 20 to 30 minutes face-to-face with the patient; with medical evaluation and management services |
| 90812 | Individual psychotherapy, interactive, using play equipment, physical devices, language interpreter, or other mechanisms of non-verbal communication, in an office or outpatient facility, approximately 45 to 50 minutes face-to-face with the patient                                                  |
| 90813 | Individual psychotherapy, interactive, using play equipment, physical devices, language interpreter, or other mechanisms of non-verbal communication, in an office or outpatient facility, approximately 45 to 50 minutes face-to-face with the patient; with medical evaluation and management services |
| 90814 | Individual psychotherapy, interactive, using play equipment, physical devices, language interpreter, or other mechanisms of non-verbal communication, in an office or outpatient facility, approximately 75 to 80 minutes face-to-face with the patient                                                  |
| 90815 | Individual psychotherapy, interactive, using play equipment, physical devices, language interpreter, or other mechanisms of non-verbal communication, in an office or outpatient facility, approximately 75 to 80 minutes face-to-face with the patient; with medical evaluation and management services |
| 90816 | Individual psychotherapy, insight oriented, behavior modifying and/or supportive, in an inpatient hospital, partial hospital or residential care setting, approximately 20 to 30 minutes face-to-face with the patient                                                                                   |
| 90817 | Individual psychotherapy, insight oriented, behavior modifying and/or supportive, in an inpatient hospital, partial hospital or residential care setting, approximately 20 to 30 minutes face-to-face with the patient; with medical evaluation and management services                                  |
| 90818 | Individual psychotherapy, insight oriented, behavior modifying and/or supportive, in an inpatient hospital, partial hospital or residential care setting, approximately 45 to 50 minutes face-to-face with the patient                                                                                   |



|       |                                                                                                                                                                                                                                                                                                                                             |
|-------|---------------------------------------------------------------------------------------------------------------------------------------------------------------------------------------------------------------------------------------------------------------------------------------------------------------------------------------------|
| 90819 | Individual psychotherapy, insight oriented, behavior modifying and/or supportive, in an inpatient hospital, partial hospital or residential care setting, approximately 45 to 50 minutes face-to-face with the patient; with medical evaluation and management services                                                                     |
| 90820 | Diagnostic interview                                                                                                                                                                                                                                                                                                                        |
| 90821 | Individual psychotherapy, insight oriented, behavior modifying and/or supportive, in an inpatient hospital, partial hospital or residential care setting, approximately 75 to 80 minutes face-to-face with the patient                                                                                                                      |
| 90822 | Individual psychotherapy, insight oriented, behavior modifying and/or supportive, in an inpatient hospital, partial hospital or residential care setting, approximately 75 to 80 minutes face-to-face with the patient; with medical evaluation and management services                                                                     |
| 90823 | Individual psychotherapy, interactive, using play equipment, physical devices, language interpreter, or other mechanisms of non-verbal communication, in an inpatient hospital, partial hospital or residential care setting, approximately 20 to 30 minutes face-to-face with the patient                                                  |
| 90824 | Individual psychotherapy, interactive, using play equipment, physical devices, language interpreter, or other mechanisms of non-verbal communication, in an inpatient hospital, partial hospital or residential care setting, approximately 20 to 30 minutes face-to-face with the patient; with medical evaluation and management services |
| 90825 | Evaluation of tests/records                                                                                                                                                                                                                                                                                                                 |
| 90826 | Individual psychotherapy, interactive, using play equipment, physical devices, language interpreter, or other mechanisms of non-verbal communication, in an inpatient hospital, partial hospital or residential care setting, approximately 45 to 50 minutes face-to-face with the patient;                                                 |
| 90827 | Individual psychotherapy, interactive, using play equipment, physical devices, language interpreter, or other mechanisms of non-verbal communication, in an inpatient hospital, partial hospital or residential care setting, approximately 45 to 50 minutes face-to-face with the patient; with medical evaluation and management services |
| 90828 | Individual psychotherapy, interactive, using play equipment, physical devices, language interpreter, or other mechanisms of non-verbal communication, in an inpatient hospital, partial hospital or residential care setting, approximately 75 to 80 minutes face-to-face with the patient                                                  |
| 90829 | Individual psychotherapy, interactive, using play equipment, physical devices, language interpreter, or other mechanisms of non-verbal communication, in an inpatient hospital, partial hospital or residential care setting, approximately 75 to 80 minutes face-to-face with the patient; with medical evaluation and management services |
| 90830 | Crisis intervention, 60 minutes                                                                                                                                                                                                                                                                                                             |
| 90832 | Psychotherapy, 30 minutes with patient                                                                                                                                                                                                                                                                                                      |
| 90833 | Psychotherapy, 30 minutes with patient when performed with an evaluation and management service (List separately in addition to the code for primary procedure)                                                                                                                                                                             |
| 90834 | Psychotherapy, 45 minutes with patient                                                                                                                                                                                                                                                                                                      |
| 90835 | Special interview                                                                                                                                                                                                                                                                                                                           |
| 90836 | Psychotherapy, 45 minutes with patient when performed with an evaluation and management service (List separately in addition to the code for primary procedure)                                                                                                                                                                             |
| 90837 | Psychotherapy, 60 minutes with patient                                                                                                                                                                                                                                                                                                      |
| 90838 | Psychotherapy, 60 minutes with patient when performed with an evaluation and management service (List separately in addition to the code for primary procedure)                                                                                                                                                                             |
| 90839 | Psychotherapy for crisis; first 60 minutes                                                                                                                                                                                                                                                                                                  |
| 90840 | Psychotherapy for crisis; each additional 30 minutes (List separately in addition to code for primary service)                                                                                                                                                                                                                              |
| 90841 | Psychotherapy                                                                                                                                                                                                                                                                                                                               |
| 90842 | Psychotherapy, 75-80 min.                                                                                                                                                                                                                                                                                                                   |
| 90843 | Psychotherapy, 20-30 min.                                                                                                                                                                                                                                                                                                                   |

|       |                                                                                                                                                                                                                                                                                    |
|-------|------------------------------------------------------------------------------------------------------------------------------------------------------------------------------------------------------------------------------------------------------------------------------------|
| 90844 | Psychotherapy, 45-50 min.                                                                                                                                                                                                                                                          |
| 90845 | Psychoanalysis                                                                                                                                                                                                                                                                     |
| 90846 | Family psychotherapy (without the patient present), 50 minutes                                                                                                                                                                                                                     |
| 90847 | Family psychotherapy (conjoint psychotherapy) (with patient present), 50 minutes                                                                                                                                                                                                   |
| 90849 | Multiple-family group psychotherapy                                                                                                                                                                                                                                                |
| 90853 | Group psychotherapy (other than of a multiple-family group)                                                                                                                                                                                                                        |
| 90855 | Individual psychotherapy                                                                                                                                                                                                                                                           |
| 90857 | Interactive group psychotherapy                                                                                                                                                                                                                                                    |
| 90862 | Pharmacologic management, including prescription, use, and review of medication with no more than minimal medical psychotherapy                                                                                                                                                    |
| 90863 | Pharmacologic management, including prescription and review of medication, when performed with psychotherapy services (List separately in addition to the code for primary procedure)                                                                                              |
| 90865 | Narco-synthesis for psychiatric diagnostic and therapeutic purposes (e.g., sodium amobarbital (Amytal) interview)                                                                                                                                                                  |
| 90885 | Psychiatric evaluation of hospital records, other psychiatric reports, psychometric and/or projective tests, and other accumulated data for medical diagnostic purposes                                                                                                            |
| 90887 | Interpretation or explanation of results of psychiatric, other medical examinations and procedures, or other accumulated data to family or other responsible persons, or advising them how to assist patient                                                                       |
| 90889 | Preparation of report of patient's psychiatric status, history, treatment, or progress (other than for legal or consultative purposes) for other individuals, agencies, or insurance carriers                                                                                      |
| 90899 | Unlisted psychiatric service or procedure                                                                                                                                                                                                                                          |
| 99492 | Initial psychiatric collaborative care management, first 70 minutes in the first calendar month of behavioral health care manager activities, in consultation with a psychiatric consultant, and directed by the treating physician or other qualified health care provider        |
| 99493 | Subsequent psychiatric collaborative care management, first 60 minutes in a subsequent month of behavioral health care manager activities, in consultation with a psychiatric consultant, and directed by the treating physician or other qualified health care                    |
| 99494 | Initial or subsequent psychiatric collaborative care management, each additional 30 minutes in a calendar month of behavioral health care manager activities, in consultation with a psychiatric consultant, and directed by the treating physician or other qualified health care |
| G0512 | Rural health clinic or federally qualified health center (RHC/FQHC) only, psychiatric collaborative care model (psychiatric COCM), 60 minutes or more of clinical staff time for psychiatric COCM services directed by an RHC or FQHC practitioner                                 |

Table S3. Numbers of children ages 3–7 years continuously enrolled in MarketScan Commercial large employer non-capitated plans in 2017 by US Census division, rural vs. non-rural residence, and sex. Children with current-year autism spectrum disorder (ASD) diagnoses had  $\geq 2$  ASD claims on separate days in the calendar year.

| Census division               | All children ages 3–7 years |              | Children with current-year ASD diagnoses |              | Administrative prevalence of current-year ASD |
|-------------------------------|-----------------------------|--------------|------------------------------------------|--------------|-----------------------------------------------|
|                               | Numbers                     | Distribution | Numbers                                  | Distribution |                                               |
| New England                   | 31,947                      | 4.4%         | 501                                      | 6.6%         | 1.6%                                          |
| Middle Atlantic               | 114,357                     | 15.9%        | 1,417                                    | 18.8%        | 1.2%                                          |
| South Atlantic                | 13,583                      | 18.8%        | 1,436                                    | 19.0%        | 1.1%                                          |
| East South Central            | 69,865                      | 9.7%         | 640                                      | 8.5%         | 0.9%                                          |
| West South Central            | 90,128                      | 12.5%        | 819                                      | 10.9%        | 0.9%                                          |
| East North Central            | 124,073                     | 17.2%        | 1,091                                    | 14.5%        | 0.9%                                          |
| West North Central            | 45,122                      | 6.3%         | 378                                      | 5.0%         | 0.8%                                          |
| Mountain                      | 40,226                      | 5.6%         | 386                                      | 5.1%         | 1.0%                                          |
| Pacific                       | 69,842                      | 9.7%         | 875                                      | 11.6%        | 1.3%                                          |
| Missing region                | 949                         | 0.1%         | 18                                       | 0.2%         | 1.9%                                          |
| Total                         | 722,348                     |              | 7,561                                    |              | 1.0%                                          |
| Rural vs. non-rural residence |                             |              |                                          |              |                                               |
| Non-rural                     | 645,216                     | 89.4%        | 7,002                                    | 92.8%        | 1.1%                                          |
| Rural                         | 76,586                      | 10.6%        | 543                                      | 7.2%         | 0.7%                                          |
| Missing                       | 546                         | 0.1%         | 16                                       | 0.2%         | 2.9%                                          |
| Total                         | 722,348                     |              | 7,561                                    |              | 1.0%                                          |
| Sex                           |                             |              |                                          |              |                                               |
| Male                          | 370,476                     | 51.3%        | 6,042                                    | 79.9%        | 1.6%                                          |
| Female                        | 351,871                     | 48.7%        | 1,519                                    | 20.1%        | 0.4%                                          |

Table S4. Mean out-of-pocket (OOP) spending in 2017 US dollars [adjusted using GDP deflator] for children ages 3–7 years continuously enrolled in large employer non-capitated plans\* by calendar year. Children with current-year autism spectrum disorder [ASD] diagnoses had  $\geq 2$  ASD claims on separate days in the calendar year.

| Year                | All enrollees                             |                                                | Enrollees with current-year ASD           |                                                | Enrollees without current-year ASD        |                                                | Ratio of mean OOP spending for children with ASD to OOP spending for other children [median] |
|---------------------|-------------------------------------------|------------------------------------------------|-------------------------------------------|------------------------------------------------|-------------------------------------------|------------------------------------------------|----------------------------------------------------------------------------------------------|
|                     | Mean (SD) [median] OOP spending [2017 \$] | Share of mean OOP spending in percent [median] | Mean (SD) [median] OOP spending [2017 \$] | Share of mean OOP spending in percent [median] | Mean (SD) [median] OOP spending [2017 \$] | Share of mean OOP spending in percent [median] |                                                                                              |
| 2011                | 383<br>(682)<br>[160]                     | 18.4<br>[22.7]                                 | 1885<br>(2015)<br>[1325]                  | 13.0<br>[21.2]                                 | 375<br>(657)<br>[159]                     | 18.5<br>[22.7]                                 | 5.0<br>[8.3]                                                                                 |
| 2012                | 398<br>(739)<br>[158]                     | 19.2<br>[22.8]                                 | 1928<br>(1894)<br>[1411]                  | 13.6<br>[22.4]                                 | 389<br>(717)<br>[156]                     | 19.4<br>[22.6]                                 | 5.0<br>[9.0]                                                                                 |
| 2013                | 409<br>(784)<br>[156]                     | 19.5<br>[23.1]                                 | 2075<br>(2111)<br>[1485]                  | 13.7<br>[22.6]                                 | 397<br>(755)<br>[154]                     | 19.7<br>[23.0]                                 | 5.2<br>[9.7]                                                                                 |
| 2014                | 422<br>(838)<br>[155]                     | 20.0<br>[23.3]                                 | 2087<br>(2197)<br>[1522]                  | 13.3<br>[22.3]                                 | 409<br>(806)<br>[152]                     | 20.3<br>[23.0]                                 | 5.1<br>[10.0]                                                                                |
| 2015                | 448<br>(847)<br>[161]                     | 20.0<br>[24.1]                                 | 2152<br>(2040)<br>[1608]                  | 12.6<br>[23.4]                                 | 432<br>(813)<br>[518]                     | 20.5<br>[23.9]                                 | 5.0<br>[10.2]                                                                                |
| 2016                | 463<br>(849)<br>[167]                     | 19.8<br>[24.7]                                 | 2218<br>(2028)<br>[1706]                  | 12.5<br>[22.6]                                 | 446<br>(812)<br>[164]                     | 20.4<br>[24.5]                                 | 5.0<br>[10.4]                                                                                |
| 2017                | 471<br>(870)<br>[167]                     | 19.9<br>[24.6]                                 | 2299<br>(2138)<br>[1788]                  | 11.5<br>[22.0]                                 | 451<br>(825)<br>[164]                     | 20.6<br>[24.5]                                 | 5.1<br>[10.9]                                                                                |
| % change, 2011-2017 | 23 <sup>s</sup><br>[4]                    |                                                | 22 <sup>s</sup><br>[35]                   |                                                | 20 <sup>s</sup><br>[3]                    |                                                |                                                                                              |

**Note:** \*Source: MarketScan Commercial database, 2011–2017.

<sup>§</sup>  $p$ -values  $< 0.001$  in two-sample  $t$ -tests (immediate form) for the changes between 2011 and 2017 in mean expenditures.

<sup>¶</sup>  $p$ -values  $< 0.001$  in two-sample tests of proportions (immediate form) for the changes between 2011 and 2017 in percentage of enrollees with current-year ASD and in spending on children with ASD as percent of spending on all children.

GDP: Gross Domestic Product

OOP: Out-of-pocket

SD: Standard Deviation

Table S5. Numbers of children ages 3–7 years continuously enrolled in MarketScan Commercial mostly fully-insured plans by calendar year and mean spending in 2017 US dollars (adjusted using GDP deflator). Children with current-year autism spectrum disorder (ASD) diagnoses had  $\geq 2$  ASD claims on separate days in the calendar year.

| Year                | All enrollees |                                  | Enrollees with current-year ASD |                                  | Enrollees without current-year ASD |                                  | Spending on children with ASD as percent of spending on all children |
|---------------------|---------------|----------------------------------|---------------------------------|----------------------------------|------------------------------------|----------------------------------|----------------------------------------------------------------------|
|                     | N             | Mean (median) spending (2017 \$) | N (%)                           | Mean (median) spending (2017 \$) | N                                  | Mean (median) spending (2017 \$) |                                                                      |
| 2011                | 546,529       | 2,018 (692)                      | 3,885 (0.71)                    | 14,193 (5,922)                   | 542,644                            | 1,931 (697)                      | 5.0                                                                  |
| 2012                | 535,188       | 2,041 (679)                      | 4,041 (0.76)                    | 18,349 (6,057)                   | 531,147                            | 1,917 (680)                      | 6.8                                                                  |
| 2013                | 242,325       | 2,054 (659)                      | 1,826 (0.75)                    | 17,928 (6,738)                   | 240,499                            | 1,934 (633)                      | 6.6                                                                  |
| 2014                | 308,594       | 1,951 (661)                      | 2,559 (0.83)                    | 15,888 (6,980)                   | 306,035                            | 1,835 (635)                      | 6.8                                                                  |
| 2015                | 116,999       | 2,058 (667)                      | 1,099 (0.94)                    | 19,936 (7,097)                   | 115,900                            | 1,888 (654)                      | 9.1                                                                  |
| 2016                | 109,232       | 2,202 (676)                      | 1,218 (1.12)                    | 20,950 (7,731)                   | 108,014                            | 1,991 (642)                      | 10.6                                                                 |
| 2017                | 112,001       | 2,127 (679)                      | 1,309 (1.17)                    | 20,504 (8,400)                   | 110,692                            | 1,910 (653)                      | 11.3                                                                 |
| % change, 2011-2017 |               | 5 (-2)                           |                                 | 44 (42)                          |                                    | -1 (-6)                          |                                                                      |

Table S6. Numbers of children ages 3–7 years continuously enrolled in MarketScan Commercial large employer capitated plans by calendar year and mean spending in 2017 US dollars (adjusted using GDP deflator). Children with current-year autism spectrum disorder (ASD) diagnoses had  $\geq 2$  ASD claims on separate days in the calendar year.

| Year                | All enrollees |                                  | Enrollees with current-year ASD |                                  | Enrollees without current-year ASD |                                  | Spending on children with ASD as percent of spending on all children |
|---------------------|---------------|----------------------------------|---------------------------------|----------------------------------|------------------------------------|----------------------------------|----------------------------------------------------------------------|
|                     | N             | Mean (median) spending (2017 \$) | N (%)                           | Mean (median) spending (2017 \$) | N                                  | Mean (median) spending (2017 \$) |                                                                      |
| 2011                | 163,512       | 1,866 (623)                      | 835 (0.51)                      | 9,861 (4,532)                    | 162,677                            | 1,825 (618)                      | 2.7                                                                  |
| 2012                | 153,614       | 1,865 (598)                      | 948 (0.62)                      | 10,669 (4,691)                   | 152,666                            | 1,810 (593)                      | 3.5                                                                  |
| 2013                | 146,488       | 1,934 (586)                      | 1,183 (0.81)                    | 16,652 (7,520)                   | 145,305                            | 1,814 (579)                      | 7.0                                                                  |
| 2014                | 84,601        | 2,087 (620)                      | 770 (0.91)                      | 18,114 (8,150)                   | 83,831                             | 1,940 (612)                      | 7.9                                                                  |
| 2015                | 89,045        | 2,247 (663)                      | 960 (1.08)                      | 22,140 (9,101)                   | 88,085                             | 2,030 (653)                      | 10.6                                                                 |
| 2016                | 90,025        | 2,359 (668)                      | 1,134 (1.26)                    | 23,999 (9,839)                   | 88,891                             | 2,083 (658)                      | 12.8                                                                 |
| 2017                | 84,497        | 2,509 (688)                      | 1,209 (1.43)                    | 28,069 (11,348)                  | 83,288                             | 2,138 (674)                      | 16.0                                                                 |
| % change, 2011-2017 |               | 34 (10)                          |                                 | 185 (150)                        |                                    | 17 (9)                           |                                                                      |

Table S7. Mean expenditures for children ages 3–5 and 6–7 years continuously enrolled in MarketScan Commercial large employer non-capitated plans by calendar year and mean spending in 2017 US dollars (adjusted using GDP deflator). Children with current-year autism spectrum disorder (ASD) diagnoses had  $\geq 2$  ASD claims on separate days in the calendar year.

| Year                | Ages 3-5 years   |                                |                             | Ages 6-7 years   |                                |                             |
|---------------------|------------------|--------------------------------|-----------------------------|------------------|--------------------------------|-----------------------------|
|                     | All expenditures | Behavioral Health expenditures | Behavioral Health share (%) | All expenditures | Behavioral Health expenditures | Behavioral Health share (%) |
| 2011                | 13,863           | 2,266                          | 16%                         | 12,365           | 1,096                          | 9%                          |
| 2012                | 14,061           | 2,410                          | 17%                         | 11,964           | 1,392                          | 12%                         |
| 2013                | 14,927           | 3,148                          | 21%                         | 13,549           | 1,856                          | 14%                         |
| 2014                | 16,259           | 3,676                          | 23%                         | 13,665           | 2,395                          | 18%                         |
| 2015                | 18,566           | 5,700                          | 31%                         | 13,903           | 3,654                          | 26%                         |
| 2016                | 19,499           | 7,609                          | 39%                         | 14,455           | 4,539                          | 31%                         |
| 2017                | 22,182           | 10,164                         | 46%                         | 16,830           | 5,724                          | 34%                         |
| % change, 2011-2017 | 60%              | 348%                           |                             | 36%              | 422%                           |                             |





Table S8. Mean spending in 2017 US dollars [adjusted using GDP deflator] for children ages 8–17 years continuously enrolled in large employer non-capitated plans\* by calendar year with  $\geq 2$  autism spectrum disorder [ASD] diagnoses on separate days in the calendar year.

| Year                | All Spending<br>2017 US\$ | Behavioral Intervention-Related (non-Emergency) Spending<br>2017 US\$ |      | Other Outpatient Services Spending<br>2017 US\$ |      | Inpatient Services Spending<br>2017 US\$ |      | Outpatient Pharmacy Spending<br>2017 US\$ |      |
|---------------------|---------------------------|-----------------------------------------------------------------------|------|-------------------------------------------------|------|------------------------------------------|------|-------------------------------------------|------|
|                     |                           | Mean                                                                  | Mean | % of all spending                               | Mean | % of all spending                        | Mean | % of all spending                         | Mean |
| 2011                | 11,757                    | 346                                                                   | 2.9  | 5,636                                           | 47.9 | 2,324                                    | 19.8 | 3,451                                     | 29.4 |
| 2012                | 12,130                    | 464                                                                   | 3.8  | 5,753                                           | 47.4 | 2,508                                    | 20.7 | 3,404                                     | 28.1 |
| 2013                | 12,487                    | 571                                                                   | 4.6  | 6,077                                           | 48.7 | 2,404                                    | 19.2 | 3,435                                     | 27.5 |
| 2014                | 13,336                    | 726                                                                   | 5.4  | 6,189                                           | 46.4 | 2,644                                    | 19.8 | 3,780                                     | 28.3 |
| 2015                | 13,663                    | 1,222                                                                 | 8.9  | 6,055                                           | 44.3 | 2,624                                    | 19.2 | 3,763                                     | 27.5 |
| 2016                | 14,397                    | 1,833                                                                 | 12.7 | 6,373                                           | 44.3 | 2,748                                    | 19.1 | 3,442                                     | 23.9 |
| 2017                | 14,650                    | 2,261                                                                 | 15.4 | 6,402                                           | 43.7 | 2,876                                    | 19.6 | 3,112                                     | 21.2 |
| % change, 2011–2017 | 25                        | 553                                                                   |      | 14                                              |      | 24                                       |      | -10                                       |      |

Table S9. Numbers of children ages 3–7 years continuously enrolled in MarketScan Commercial large employer non-capitated plans by calendar year and mean spending in 2017 US dollars (adjusted using GDP deflator).

| Year | Enrollees with current-year ASD (≥2 ASD claims in calendar year) |                                  | Enrollees with ASD (≥1 ASD claim in calendar year and a second claim <12 months) |                                  | Enrollees with ASD (≥1 ASD claim in calendar year and a second claim in 5 years) |                                  | Enrollees with 5-year ASD (≥2 ASD claims on separate days in 5 calendar years) |                                  |
|------|------------------------------------------------------------------|----------------------------------|----------------------------------------------------------------------------------|----------------------------------|----------------------------------------------------------------------------------|----------------------------------|--------------------------------------------------------------------------------|----------------------------------|
|      | N (%)                                                            | Mean (median) spending (2017 \$) | N (%)                                                                            | Mean (median) spending (2017 \$) | N (%)                                                                            | Mean (median) spending (2017 \$) | N (%)                                                                          | Mean (median) spending (2017 \$) |
| 2011 | 4,246 (0.56)                                                     | 13,198 (6,245)                   | 4,821 (0.63)                                                                     | 12,602 (5,727)                   | 5,550 (0.73)                                                                     | 11,720 (5,354)                   | 10,089 (1.33)                                                                  | 8,685 (3,563)                    |
| 2012 | 4,813 (0.61)                                                     | 13,126 (6,303)                   | 5,406 (0.69)                                                                     | 12,436 (5,891)                   | 6,140 (0.78)                                                                     | 11,628 (5,441)                   | 10,907 (1.39)                                                                  | 8,983 (3,643)                    |
| 2013 | 5,382 (0.67)                                                     | 14,316 (6,573)                   | 6,021 (0.75)                                                                     | 13,495 (6,009)                   | 6,791 (0.85)                                                                     | 12,605 (5,483)                   | 11,684 (1.45)                                                                  | 9,807 (3,743)                    |
| 2014 | 6,090 (0.77)                                                     | 15,140 (6,830)                   | 6,796 (0.85)                                                                     | 14,118 (6,216)                   | --                                                                               | --                               | --                                                                             | --                               |
| 2015 | 6,550 (0.87)                                                     | 16,600 (6,871)                   | 7,245 (0.96)                                                                     | 15,554 (6,300)                   | --                                                                               | --                               | --                                                                             | --                               |
| 2016 | 6,989 (0.94)                                                     | 17,387 (7,535)                   | 7,669 (1.03)                                                                     | 16,341 (6,824)                   | --                                                                               | --                               | --                                                                             | --                               |

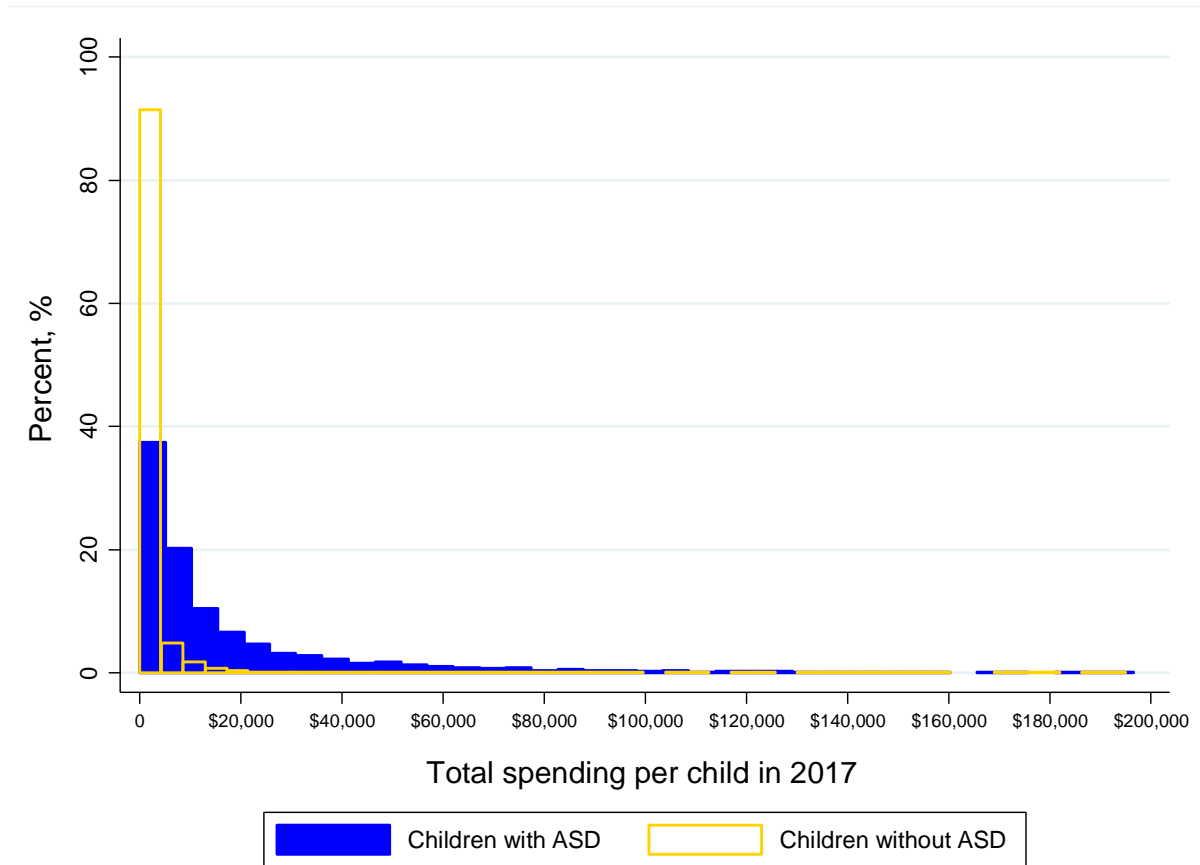

Figure S1. Distribution of total per-child expenditures in 2017 for children ages 3-7 years with and without current-year ASD diagnoses, MarketScan Commercial data
